# Supplementary material for: Design, Synthesis and Characterization of a Highly Effective Inhibitor for Analog-Sensitive (as) Kinases
Source: PubMed Central journal article supplement (PMC3117834; doi:10.1371/journal.pone.0020789), 2011-06-17
Supplement: pone.0020789.s001.pdf [file pone.0020789.s001.pdf]

|                            |
|----------------------------|
| kinase                     |
| other enzyme               |
| cytoskeleton               |
| transcriptional regulation |
| cell wall                  |

| probeid           | 6a    | gene  | essential | feature_type  | GO_process                                                   | GO_function                                          | GO_component                          |
|-------------------|-------|-------|-----------|---------------|--------------------------------------------------------------|------------------------------------------------------|---------------------------------------|
| YDR208W::chr4_5   | 5,339 | MSS4  | yes       | ORF::Verified | sporulation (sensu Fungi)*                                   | 1-phosphatidylinositol-4-phosphate 5-kinase activity | plasma membrane                       |
| YJL183W::chr10_1  | 4,898 | MNN11 | no        | ORF::Verified | protein amino acid glycosylation                             | alpha-1,6-mannosyltransferase activity               | alpha-1,6-mannosyltransferase complex |
| YKL013C::chr11_1  | 4,01  | ARC19 | yes       | ORF::Verified | mitochondrion inheritance*                                   | structural molecule activity                         | Arp2/3 protein complex                |
| YIL105C::chr9_2   | 3,976 | SLM1  | no        | ORF::Verified | actin cytoskeleton organization and biogenesis*              | phosphoinositide binding                             | cytoplasm*                            |
| YLR337C::chr12_5  | 3,394 | VRP1  | no        | ORF::Verified | endocytosis*                                                 | actin binding                                        | actin cortical patch                  |
| YDR245W::chr4_6   | 3,252 | MNN10 | no        | ORF::Verified | actin filament organization*                                 | alpha-1,6-mannosyltransferase activity               | alpha-1,6-mannosyltransferase complex |
| YGL013C::chr7_1   | 3,101 | PDR1  | no        | ORF::Verified | regulation of transcription from RNA polymerase II promoter* | DNA binding*                                         | nucleus                               |
| YDR226W::chr4_5   | 2,925 | ADK1  | no        | ORF::Verified | nucleotide metabolism*                                       | adenylate kinase activity                            | cytoplasm*                            |
| YGL084C::chr7_1   | 2,752 | GUP1  | no        | ORF::Verified | telomere maintenance*                                        | O-acyltransferase activity                           | endoplasmic reticulum*                |
| YMR109W::chr00_9  | 2,734 | MYO5  | no        | ORF::Verified | cell wall organization and biogenesis*                       | microfilament motor activity                         | actin cortical patch                  |
| YLR370C::chr00_11 | 2,69  | ARC18 | no        | ORF::Verified | actin filament organization*                                 | structural constituent of cytoskeleton               | Arp2/3 protein complex                |
| YGR037C::chr7_4   | 2,516 | ACB1  | no        | ORF::Verified | fatty acid metabolism*                                       | long-chain fatty acid transporter activity*          | cytoplasm*                            |
| YMR068W::chr00_6  | 2,476 | AVO2  | no        | ORF::Verified | regulation of cell growth*                                   | molecular function unknown                           | cytoplasm*                            |

|                    |       |           |     |                      |                                                 |                                                   |                            |
|--------------------|-------|-----------|-----|----------------------|-------------------------------------------------|---------------------------------------------------|----------------------------|
| YNR035C::chr14_4   | 2,425 | ARC35     | yes | ORF::Verified        | actin cytoskeleton organization and biogenesis* | structural molecule activity                      | cytosol*                   |
| YNR049C::chr14_4   | 2,404 | MSO1      | no  | ORF::Verified        | sporulation (sensu Fungi)*                      | molecular function unknown                        | microsome                  |
| YGL167C::chr7_2    | 2,303 | PMR1      | no  | ORF::Verified        | secretory pathway*                              | calcium-transporting ATPase activity*             | Golgi apparatus            |
| YJL202C::chr10_1   | 2,223 | YJL202C   | yes | ORF::Dubious         |                                                 |                                                   |                            |
| YOR035C::chr15_1   | 2,223 | SHE4      | no  | ORF::Verified        | actin cytoskeleton organization and biogenesis* | myosin binding                                    | cytoplasm                  |
| YGL168W::chr7_2    | 2,183 | HUR1      | no  | ORF::Uncharacterized | telomere maintenance*                           | molecular function unknown                        | nucleus                    |
| YPR095C::chr16_4   | 2,032 | SYT1      | no  | ORF::Verified        | vesicle-mediated transport*                     | ARF guanyl-nucleotide exchange factor activity    | mitochondrion              |
| YPL254W::chr16_1   | 2,022 | HFI1      | no  | ORF::Verified        | telomere maintenance*                           | transcription coactivator activity*               | SAGA complex*              |
| YOL051W::chr15_5   | 1,966 | GAL11     | no  | ORF::Verified        | telomere maintenance*                           | RNA polymerase II transcription mediator activity | mediator complex           |
| YMR031W-A::chr13_2 | 1,95  | YMR031W-A | no  | ORF::Dubious         |                                                 |                                                   |                            |
| YJR065C::chr00_13  | 1,908 | ARP3      | yes | ORF::Verified        | actin filament organization*                    | structural constituent of cytoskeleton*           | Arp2/3 protein complex     |
| YJL111W::chr10_2   | 1,816 | CCT7      | yes | ORF::Verified        | protein folding*                                | unfolded protein binding                          | cytoplasm*                 |
| YGL242C::chr7_3    | 1,814 | YGL242C   | no  | ORF::Uncharacterized | biological process unknown                      | molecular function unknown                        | cellular component unknown |
| YFL025C::chr6_1    | 1,773 | BST1      | no  | ORF::Verified        | ER to Golgi vesicle-mediated transport*         | carboxylic ester hydrolase activity               | endoplasmic reticulum*     |
| YIL034C::chr9_1    | 1,765 | CAP2      | no  | ORF::Verified        | filamentous growth*                             | actin filament binding                            | actin cortical patch*      |
| YML115C::chr00_15  | 1,741 | VAN1      | no  | ORF::Verified        | protein amino acid N-linked glycosylation       | mannosyltransferase activity                      | membrane*                  |
| YNL054W::chr14_3   | 1,6   | VAC7      | no  | ORF::Verified        | vacuole inheritance*                            | enzyme regulator activity                         | cytoplasm*                 |
| YIL142W::chr9_2    | 1,577 | CCT2      | yes | ORF::Verified        | protein folding*                                | unfolded protein binding                          | cytoplasm*                 |

|                   |       |         |    |               |                                                                       |                                                          |                                            |
|-------------------|-------|---------|----|---------------|-----------------------------------------------------------------------|----------------------------------------------------------|--------------------------------------------|
| YLR055C::chr12_2  | 1,575 | SPT8    | no | ORF::Verified | positive regulation of transcription from RNA polymerase II promoter* | transcription cofactor activity*                         | nucleus*                                   |
| YDL117W::chr4_2   | 1,559 | CYK3    | no | ORF::Verified | cytokinesis                                                           | molecular function unknown                               | cytoplasm*                                 |
| YKL126W::chr11_2  | 1,531 | YPK1    | no | ORF::Verified | protein amino acid phosphorylation*                                   | protein serine/threonine kinase activity                 | cytosol*                                   |
| YOR290C::chr15_4  | 1,516 | SNF2    | no | ORF::Verified | chromatin remodeling*                                                 | general RNA polymerase II transcription factor activity* | SWI/SNF complex*                           |
| YPR060C::chr16_4  | 1,496 | ARO7    | no | ORF::Verified | aromatic amino acid family biosynthesis                               | chorismate mutase activity                               | cytoplasm*                                 |
| YNL170W::chr14_2  | 1,417 | YNL170W | no | ORF::Dubious  |                                                                       |                                                          |                                            |
| YLR293C::chr12_4  | 1,397 | GSP1    | no | ORF::Verified | rRNA processing*                                                      | GTPase activity                                          | cytoplasm*                                 |
| YBR036C::chr2_2   | 1,396 | CSG2    | no | ORF::Verified | calcium ion homeostasis*                                              | enzyme regulator activity                                | integral to endoplasmic reticulum membrane |
| YNL047C::chr00_18 | 1,391 | SLM2    | no | ORF::Verified | actin cytoskeleton organization and biogenesis*                       | phosphoinositide binding                                 | plasma membrane*                           |
| YPL215W::chr16_1  | 1,382 | CBP3    | no | ORF::Verified | protein complex assembly                                              | molecular function unknown                               | mitochondrial envelope                     |
| YDR392W::chr4_7   | 1,369 | SPT3    | no | ORF::Verified | sporulation (sensu Fungi)*                                            | transcription cofactor activity                          | SAGA complex*                              |
| YBR078W::chr2_2   | 1,362 | ECM33   | no | ORF::Verified | cell wall organization and biogenesis                                 | molecular function unknown                               | mitochondrion*                             |
| YLR330W::chr12_5  | 1,298 | CHS5    | no | ORF::Verified | spore wall assembly (sensu Fungi)*                                    | molecular function unknown                               | cytoplasm                                  |
| YAL066W::chr1_1   | 1,252 | YAL066W | no | ORF::Dubious  |                                                                       |                                                          |                                            |
| YHR060W::chr8_2   | 1,25  | VMA22   | no | ORF::Verified | protein complex assembly*                                             | unfolded protein binding                                 | endoplasmic reticulum membrane             |
| YDR490C::chr4_8   | 1,247 | PKH1    | no | ORF::Verified | protein amino acid phosphorylation*                                   | protein kinase activity                                  | cytosol                                    |
| YLR372W::chr12_5  | 1,227 | SUR4    | no | ORF::Verified | telomere maintenance*                                                 | fatty acid elongase activity                             | endoplasmic reticulum*                     |
| YGR104C::chr      | 1,203 | SRB5    | no | ORF::Verified | telomere maintenance*                                                 | RNA polymerase II transcription                          | mediator complex                           |

|                   |       |         |     |               |                                                                       |                                                                 |                                                     |
|-------------------|-------|---------|-----|---------------|-----------------------------------------------------------------------|-----------------------------------------------------------------|-----------------------------------------------------|
| 7_4               |       |         |     |               |                                                                       | mediator activity                                               |                                                     |
| YPL242C::chr16_1  | 1,197 | IQG1    | yes | ORF::Verified | actin filament organization*                                          | cytoskeletal protein binding                                    | contractile ring (sensu Saccharomyces)              |
| YNL233W::chr14_2  | 1,196 | BNI4    | no  | ORF::Verified | chitin biosynthesis*                                                  | protein binding                                                 | bud neck*                                           |
| YLR242C::chr12_4  | 1,169 | ARV1    | no  | ORF::Verified | telomere maintenance*                                                 | molecular function unknown                                      | endoplasmic reticulum*                              |
| YDL192W::chr4_3   | 1,16  | ARF1    | no  | ORF::Verified | telomere maintenance*                                                 | GTPase activity                                                 | cytosol*                                            |
| YMR242C::chr13_5  | 1,158 | RPL20A  | no  | ORF::Verified | translation                                                           | structural constituent of ribosome                              | cytosolic large ribosomal subunit (sensu Eukaryota) |
| YIL062C::chr9_1   | 1,123 | ARC15   | yes | ORF::Verified | mitochondrion inheritance*                                            | structural molecule activity*                                   | mitochondrial envelope*                             |
| YOL050C::chr15_5  | 1,103 | YOL050C | no  | ORF::Dubious  |                                                                       |                                                                 |                                                     |
| YNL225C::chr14_2  | 1,086 | CNM67   | no  | ORF::Verified | microtubule nucleation*                                               | structural constituent of cytoskeleton                          | spindle pole body*                                  |
| YOL148C::chr00_18 | 1,06  | SPT20   | no  | ORF::Verified | histone acetylation*                                                  | transcription cofactor activity                                 | SAGA complex*                                       |
| YJL204C::chr10_1  | 1,053 | RCY1    | no  | ORF::Verified | endocytosis                                                           | protein binding                                                 | Golgi apparatus*                                    |
| YNL199C::chr14_2  | 1,05  | GCR2    | no  | ORF::Verified | positive regulation of transcription from RNA polymerase II promoter* | transcriptional activator activity                              | nucleus                                             |
| YHR207C::chr8_3   | 1,029 | SET5    | no  | ORF::Verified | biological process unknown                                            | molecular function unknown                                      | cytoplasm*                                          |
| YPL031C::chr16_3  | 1,029 | PHO85   | no  | ORF::Verified | telomere maintenance*                                                 | cyclin-dependent protein kinase activity                        | nucleus                                             |
| YAL023C::chr1_1   | 1,019 | PMT2    | no  | ORF::Verified | protein amino acid O-linked glycosylation                             | dolichyl-phosphate-mannose-protein mannosyltransferase activity | endoplasmic reticulum                               |
| YPL161C::chr16_2  | 1,012 | BEM4    | no  | ORF::Verified | telomere maintenance*                                                 | molecular function unknown                                      | cytoplasm*                                          |
| YLR087C::chr12_2  | 1,004 | CSF1    | no  | ORF::Verified | fermentation                                                          | molecular function unknown                                      | mitochondrion                                       |
